# Supplementary material
Source: Elsevier journal article supplement (https://www.sciencedirect.com/science/article/pii/S0034745021000810)

Material Suplementario

¿Cómo especialista, qué podemos hacer para ayudar a la población?, tanto a población en general como a la población con enfermedad mental establecida?

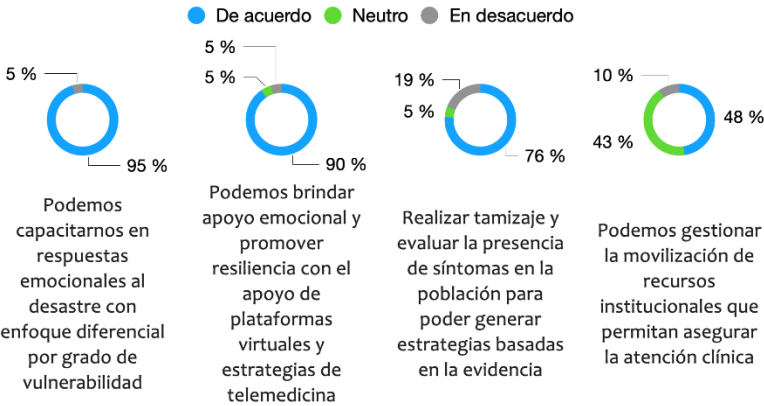

¿Cuáles cree que son las expectativas que tiene la sociedad frente al papel del médico especialista en psiquiatría en una pandemia?

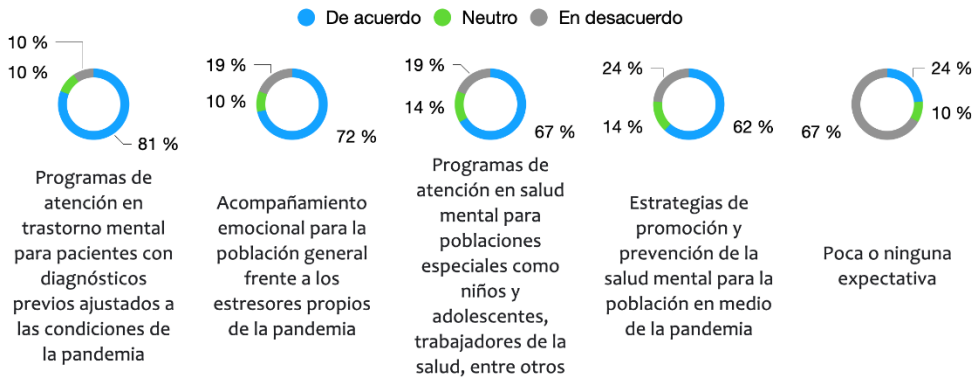

¿Tiene dudas o temores respecto a la capacidad de prestar servicios profesionales?

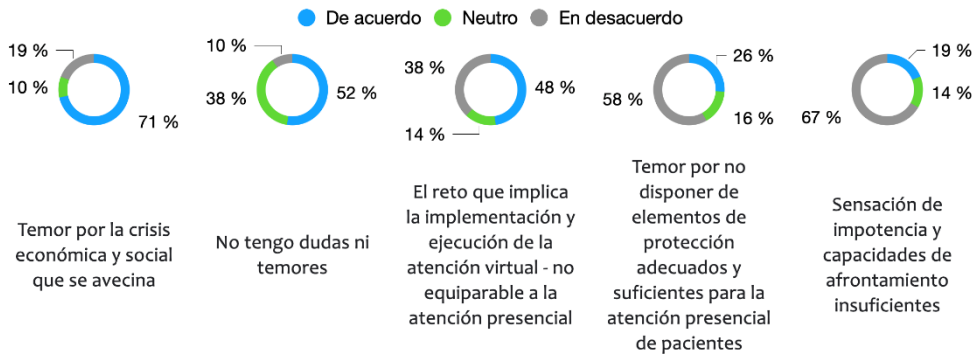

## ¿Qué piensa de la continuidad del tratamiento (farmacológico y psicoterapéutico) de sus pacientes?

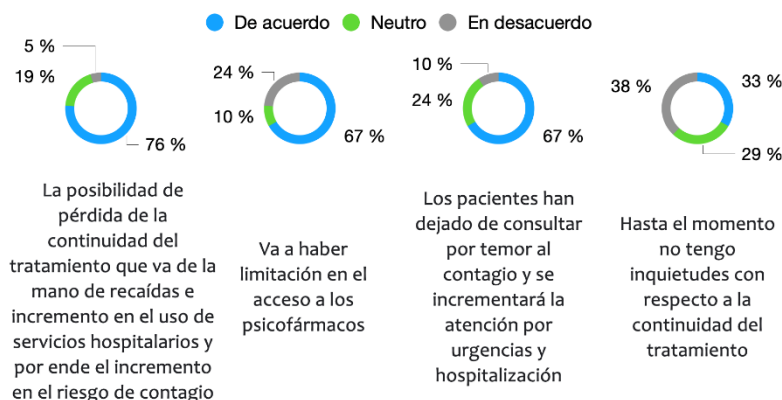

## ¿Cuál cree usted que puede ser el impacto de la pandemia COVID-19 en la calidad de la atención en salud mental de los pacientes psiquiátricos?, tanto durante la pandemia, como en el estadio post-pandemia

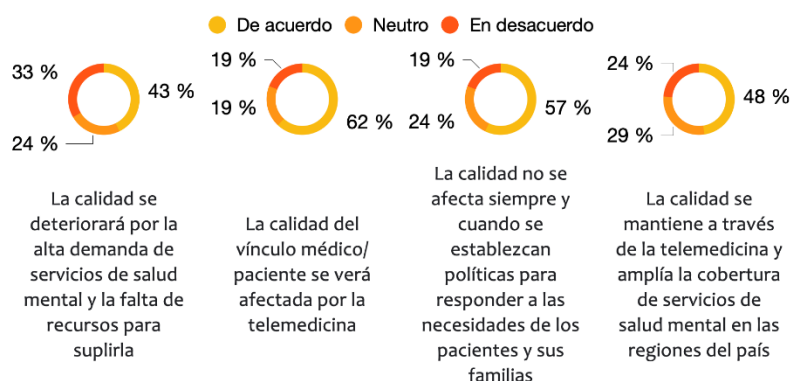

## ¿Cómo cree usted que se modificará la prestación del servicio en psiquiatría luego de la pandemia?

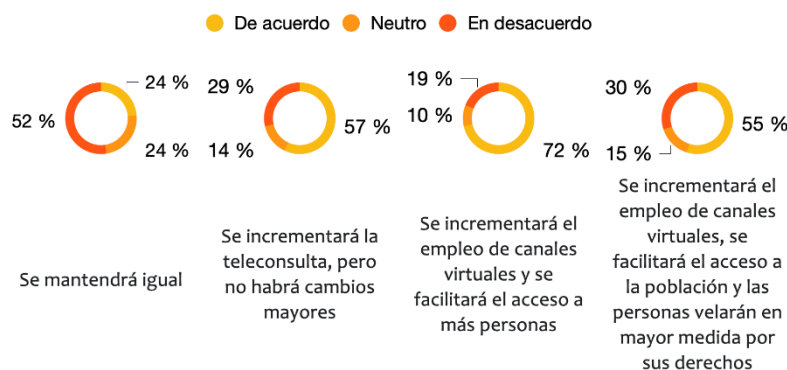

Supplement: mmc1 [file S0034745021000810:mmc1.pdf]
